# Supplementary figures and images for: Non-invasive isolation of rare circulating tumor cells with a DNA mimic of double-sided tape using multimeric aptamers
Source: Royal Society of Chemistry journal article supplement (doi:10.1039/c9nr00364a), 2019-01-01

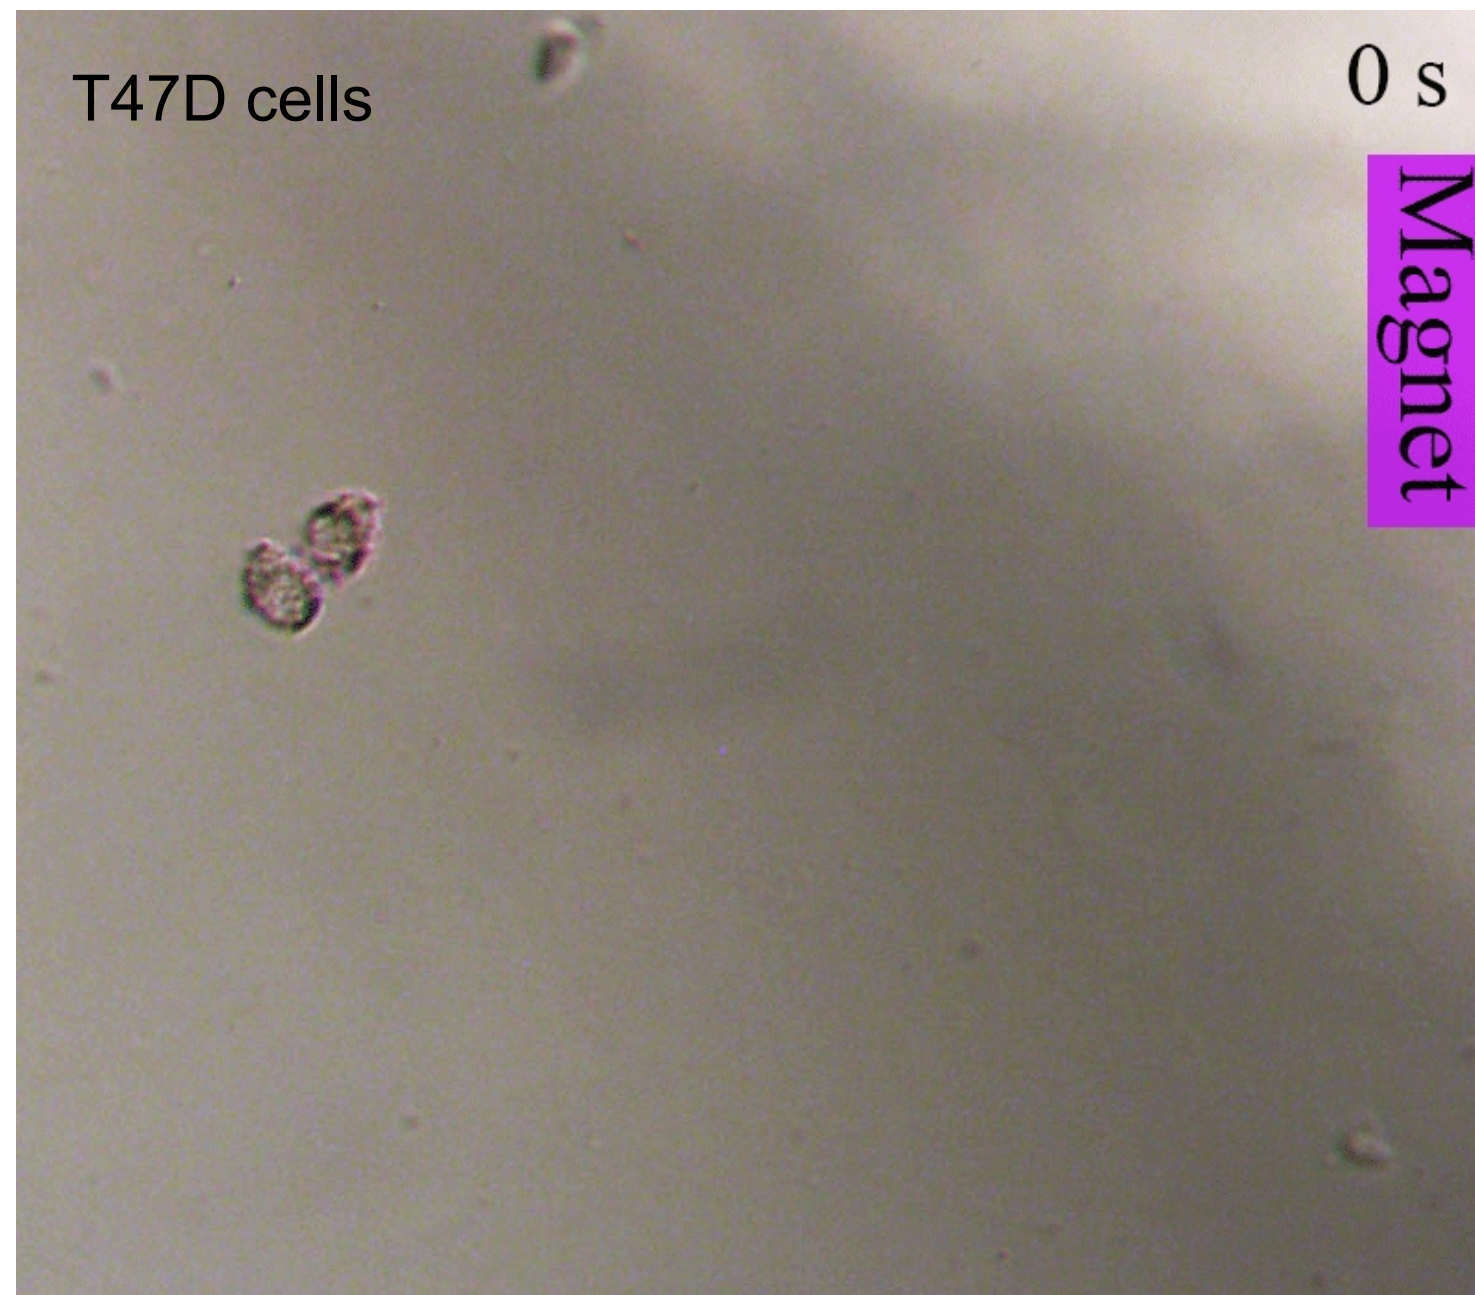

Supplement: c9nr00364a2.pdf [file c9nr00364a2.pdf]

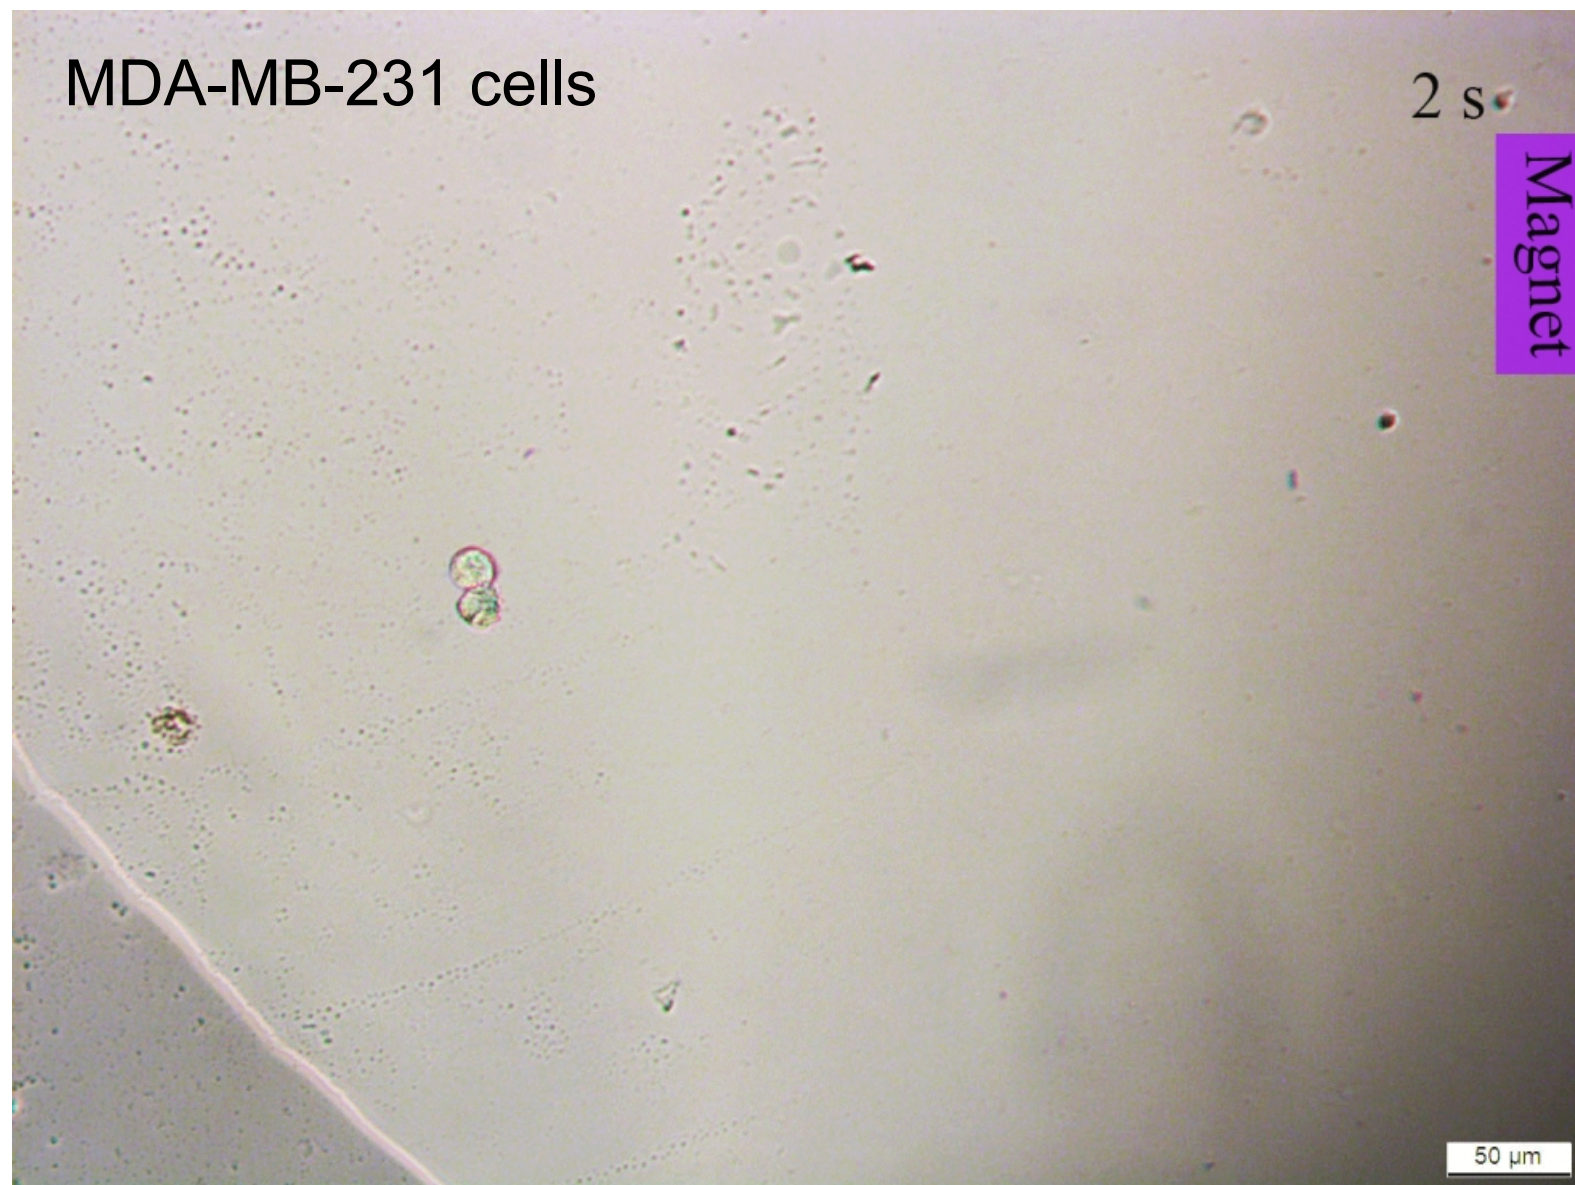

Supplement: c9nr00364a3.pdf [file c9nr00364a3.pdf]
